# Supplementary material for: The SGLT2 inhibitor empagliflozin improves cardiac energy status via mitochondrial ATP production in diabetic mice
Source: PubMed Central journal article supplement (PMC10023657; doi:10.1038/s42003-023-04663-y), 2023-03-17
Supplement: 42003_2023_4663_MOESM2_ESM.pdf [file 42003_2023_4663_MOESM2_ESM.pdf]

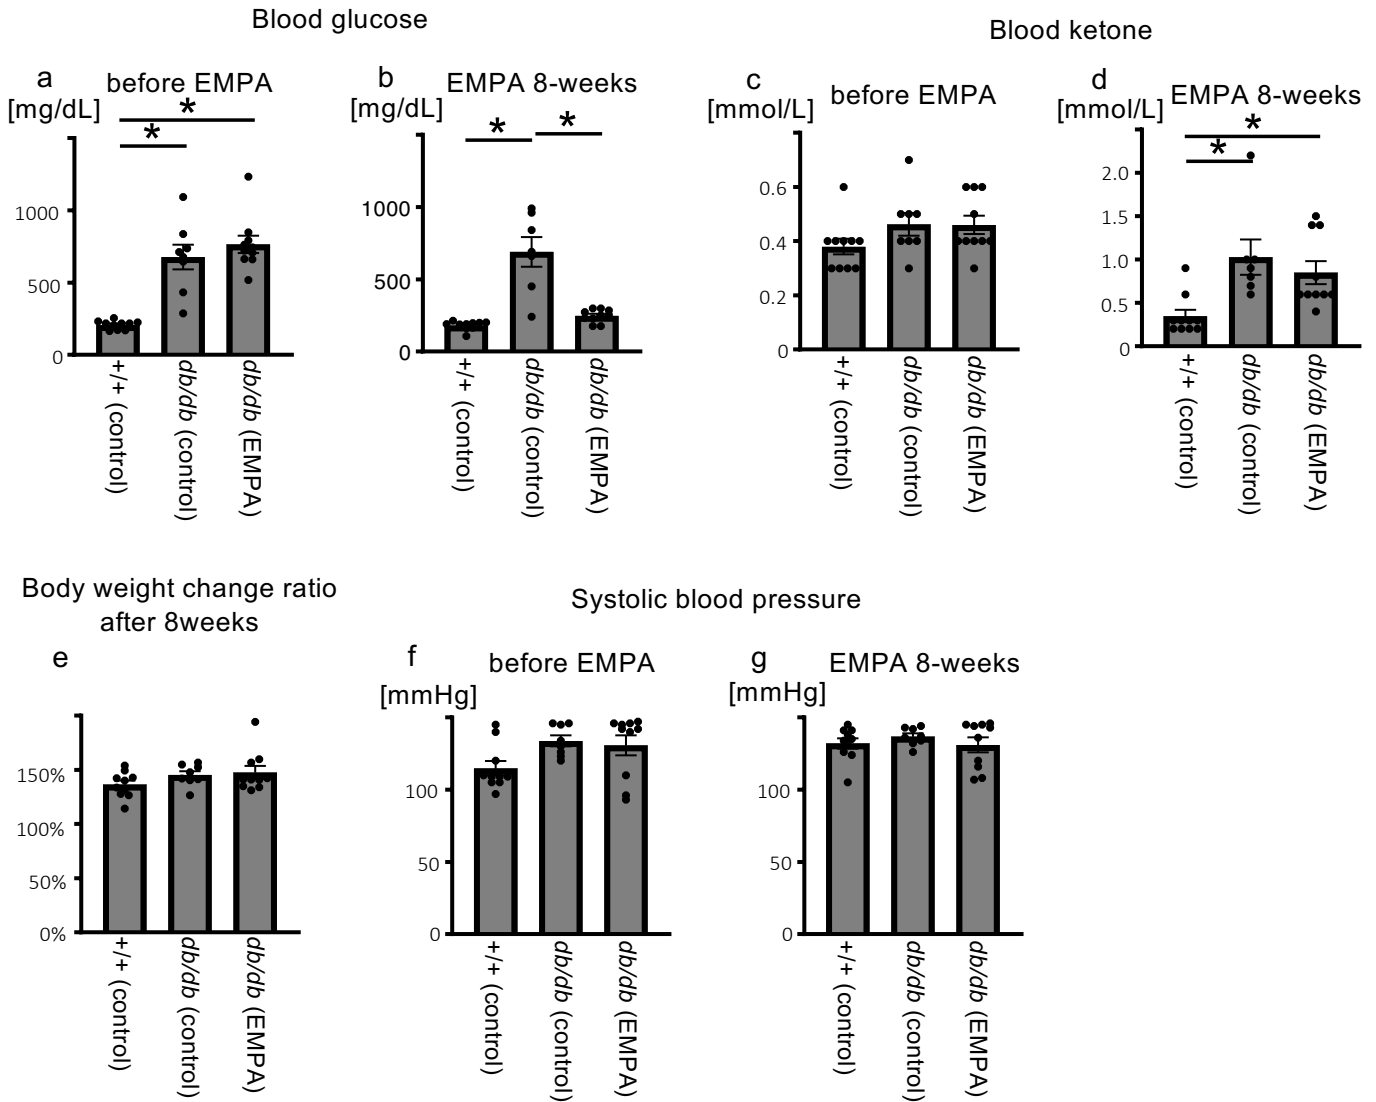

**Supplementary Figure 1. Effects of chronic treatment with empagliflozin on systolic blood pressure,**

**blood ketone, blood glucose and body weight in cytoATP-Tg mice. a-b** Graph of the blood glucose before

treatment with empagliflozin (**a**) (+/+ [control]:  $n = 10$ ,  $db/db$  [control]:  $n = 8$ ,  $db/db$  [EMPA]:  $n = 10$ ; EMPA:

empagliflozin) and after 8-week treatment with empagliflozin (**b**) (+/+ [control]:  $n = 10$ ,  $db/db$  [control]:  $n = 8$ ,

$db/db$  [EMPA]:  $n = 10$ ). \* $p = 0.000$ . **c-d** Graph of the blood ketone before treatment with empagliflozin (**c**)

(+/+ [control]:  $n = 10$ ,  $db/db$  [control]:  $n = 8$ ,  $db/db$  [EMPA]:  $n = 10$ ) and after 8-week treatment with

empagliflozin (**d**) (+/+ [control]:  $n = 10$ ,  $db/db$  [control]:  $n = 8$ ,  $db/db$  [EMPA]:  $n = 10$ ). \* $p = 0.005$ ,  $0.004$

each. **e** Graph of the body weight change ratio after 8 weeks (+/+ [control]:  $n = 10$ ,  $db/db$  [control]:  $n = 8$ ,

$db/db$  [EMPA]:  $n = 10$ ). **f-g** Graph of the systolic blood pressure before treatment with empagliflozin (**f**) (+/+

[control]:  $n = 10$ ,  $db/db$  [control]:  $n = 8$ ,  $db/db$  [EMPA]:  $n = 10$ ) and after 8-week treatment with

empagliflozin (**g**) (+/+ [control]:  $n = 10$ ,  $db/db$  [control]:  $n = 8$ ,  $db/db$  [EMPA]:  $n = 10$ ).

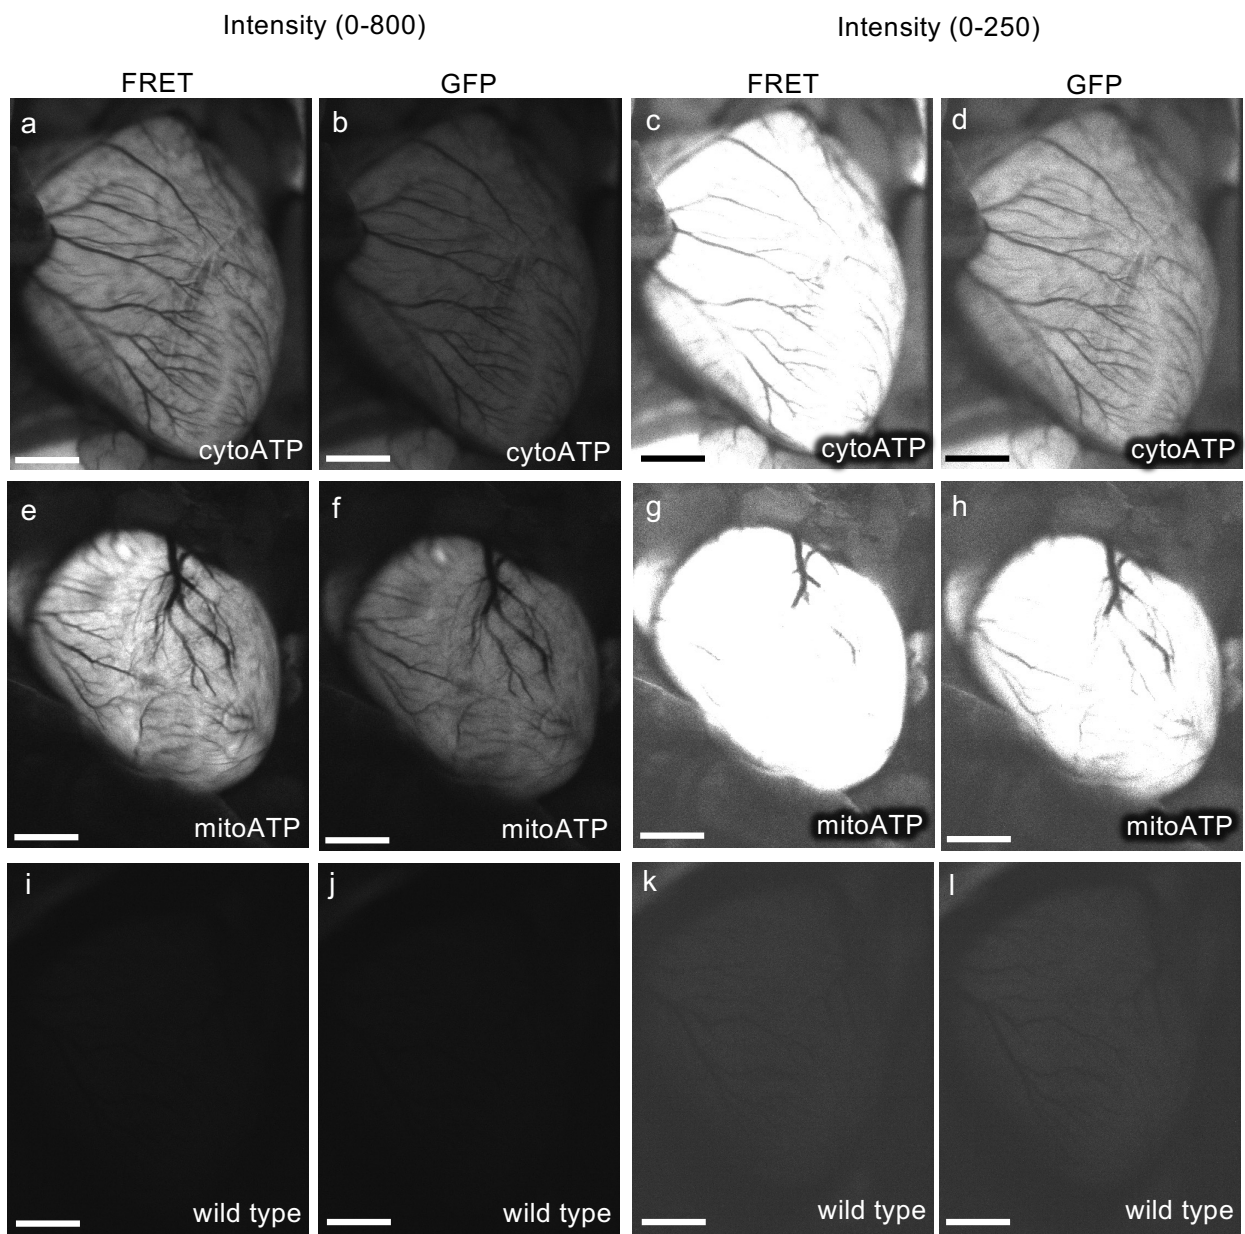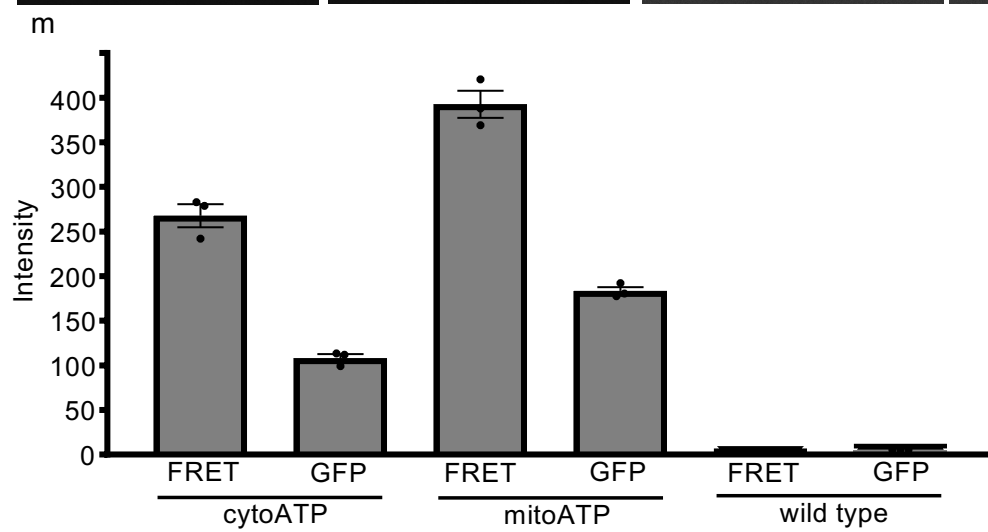

**Supplementary Figure 2. Autofluorescence in the hearts did not have a significant effect on measurement of FRET and GFP.** **a-d** Fluorescence intensity of FRET (**a, c**) and GFP (**b, d**) in a live heart of a cytoATP-Tg mouse (FRET, Fluorescence Resonance Energy Transfer). Higher brightness indicates stronger intensity. Scale bar: 2 mm. **e-h** Fluorescence intensity of FRET (**e, g**) and GFP (**f, h**) in a live heart of a mitoATP-Tg mouse. Higher brightness indicates stronger intensity. Scale bar: 2 mm. **i-l** Autofluorescence intensity of FRET (**i, k**) and GFP (**j, l**) in a live heart of a wild-type mouse. Higher brightness indicates stronger intensity. Scale bar: 2 mm. **m** Graph of the intensity of FRET and GFP in each mouse (cytoATP:  $n = 3$ , mitoATP:  $n = 3$ , wild type:  $n = 3$ ).

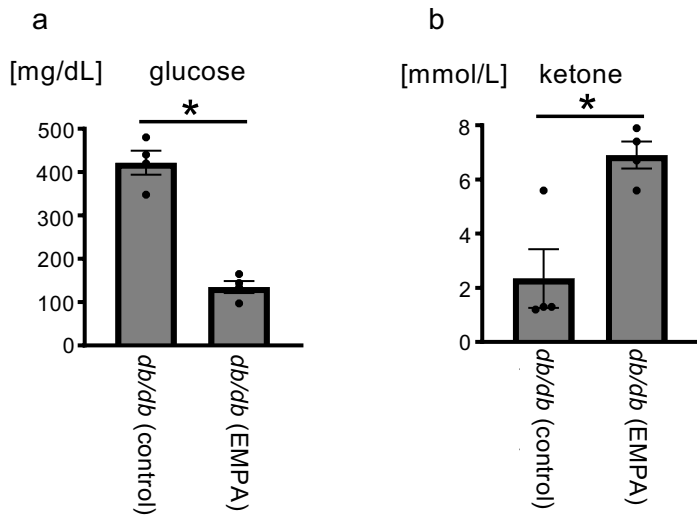

**Supplementary Figure 3. Effects of single treatment with empagliflozin on blood glucose and blood ketone in *db/db*; mitoATP-Tg mice. a-b** Graph of the blood glucose (a) and ketone (b) levels in *db/db*; mitoATP-Tg mice after 4 h of fasting followed by 3 h of control or empagliflozin (30 mg/kg b.w., EMPA) treatment (*db/db* [control]:  $n = 4$ , *db/db* [EMPA]:  $n = 4$ ; EMPA: empagliflozin). \* $p = 0.000, 0.009$  each.
